# Supplementary material
Source: PubMed Central journal article supplement (PMC5378125)

1 **Electronic Supplementary Material 1 for**

2 *Elevated nonlinearity as an indicator of shifts*

3 *in the dynamics of populations under stress*

4 Vasilis Dakos, Sarah M. Glaser, Chih-hao Hsieh, and George Sugihara

5

6

7 **Table S1** Pearson correlations between indicators for exploited and unexploited populations

8 in the Northeast Shelf System (NES) and the southern California Current Ecosystem (CCE).

9 p-values are given in parentheses and those  $< 0.05$  are bolded.

---

| <i>Pearson</i>      | <b>NES</b>       |                    | <b>CCE</b>         |                    | <b>Both datasets</b> |                        |
|---------------------|------------------|--------------------|--------------------|--------------------|----------------------|------------------------|
| <i>Correlations</i> | <i>Exploited</i> | <i>Unexploited</i> | <i>Exploited</i>   | <i>Unexploited</i> | <i>Exploited</i>     | <i>Unexploited</i>     |
| CV-AR1              | -0.15(0.54)      | -0.3(0.43)         | <b>-0.48(0.03)</b> | 0.007(0.98)        | -0.15(0.33)          | -0.16(0.51)            |
| CV- $\Delta q$      | 0.32(0.16)       | <b>0.78(0.01)</b>  | <b>0.51(0.02)</b>  | 0.29(0.44)         | <b>0.37(0.02)</b>    | <b>0.81(&lt;0.001)</b> |
| AR1- $\Delta q$     | -0.004(0.98)     | 0.25(0.51)         | -0.03(0.89)        | 0.26(0.49)         | 0.03(0.87)           | 0.31(0.21)             |

---

10

11 **Figure S1** Bifurcation analysis, dynamical attractors (a, b), eigenvalues and Lyapunov  
 12 exponents (c, d) of the deterministic model. In (a, b) we assume that demographic changes  
 13 shift the growth rate  $r$ . Dynamically, a stable equilibrium is replaced by stable but spiraling  
 14 dynamics, and as growth rate increases, the system starts to oscillate in cycles of increasing  
 15 periods before becoming chaotic in a series of period-doubling bifurcations. At the boundary  
 16 value ( $r = 0$ ), the population shifts to extinction at a transcritical bifurcation. In (c, d) we  
 17 assume a population experiencing exploitation pressure. Dynamically, we have a stable  
 18 equilibrium that is replaced by an alternative state at the crossing of a fold bifurcation.  
 19 Theoretically, we measure stability based on the eigenvalue (the rate of return to equilibrium)  
 20 and the Lyapunov exponent (the rate of divergence from equilibrium after a small  
 21 perturbation). Eigenvalues crossing unity ( $-1, +1$ ) signify loss of stability, negative Lyapunov  
 22 exponents signify convergence (stability), and positive Lyapunov exponents signify  
 23 divergence (instability and chaotic dynamics).

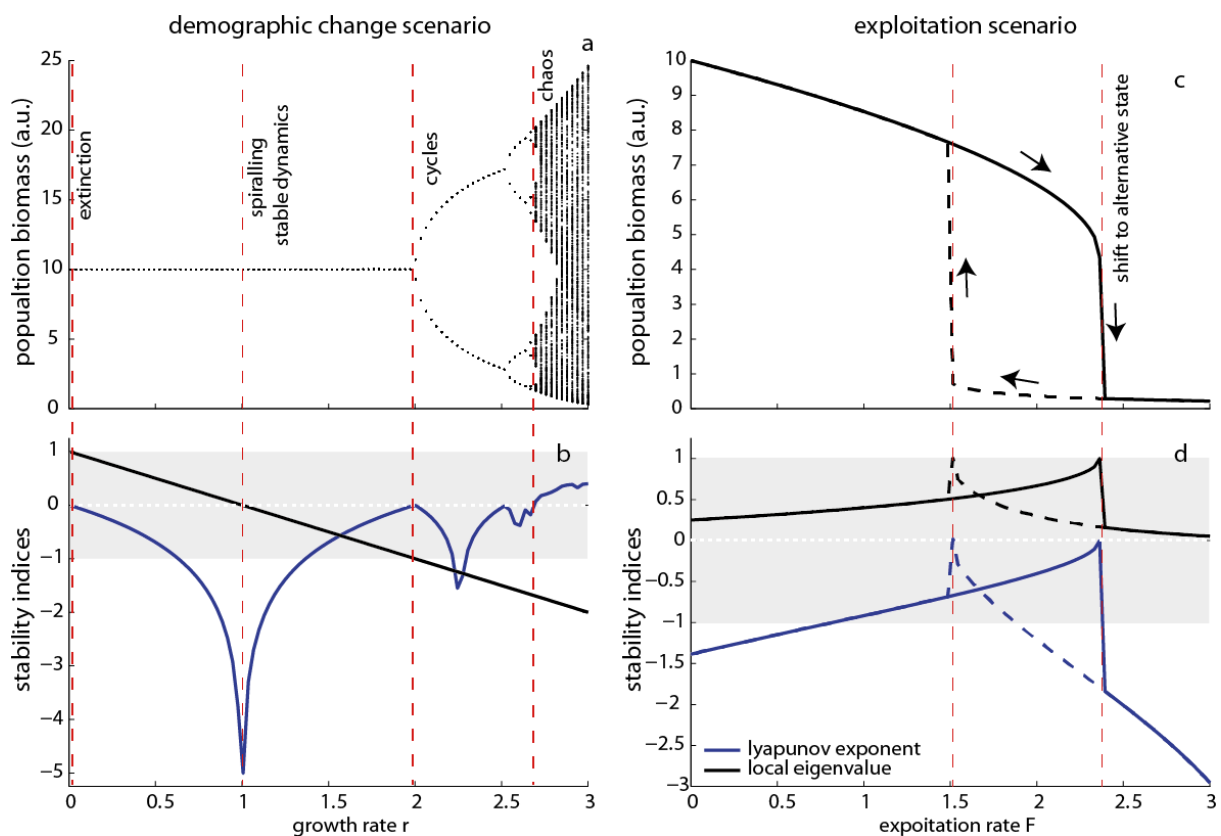

25 **Figure S2** Critical slowing down and nonlinearity indicators for the two scenarios (mean and  
 26 95% confidence intervals (CI) based on 1000 simulations) for each level of growth rate  $r$  and  
 27 exploitation rate  $F$ . (a, c, e) In the demographic change scenario, changes are not monotonic  
 28 but depend on the type of dynamical regime. Red dashed lines indicate the thresholds between  
 29 extinction, stable, spiralling stable dynamics, cycles, and chaos of the deterministic model. (b,  
 30 d, f) In the exploitation scenario, all indicators change monotonically before the shift to  
 31 overexploitation. Red dashed line indicates the threshold at which 50% of the 1000  
 32 populations collapse to the alternative overexploited state. Note the strong CI for  $\Delta Q$  in the  
 33 exploitation scenario. Critical slowing down indicators: coefficient of variation  $CV$  and  
 34 autocorrelation at-lag-1  $ARI$ . Nonlinearity indicator  $\Delta Q$ .

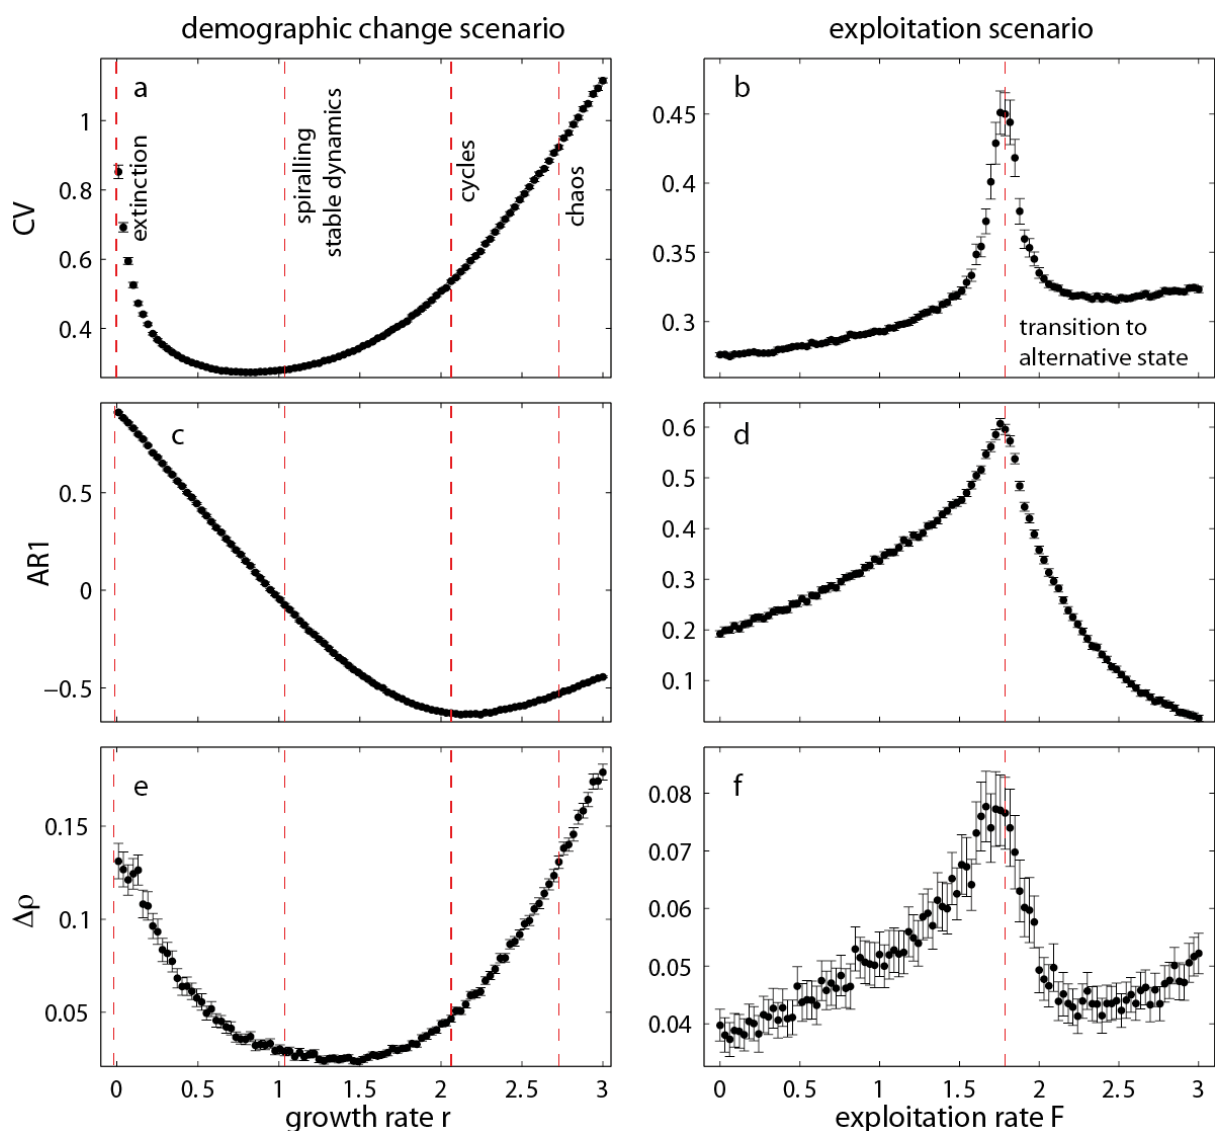

Supplement: rsif20160845supp1.pdf [file rsif20160845supp1.pdf]
